# Supplementary material for: Under-Dominance Constrains the Evolution of Negative Autoregulation in Diploids
Source: PLOS journal article supplement (doi:10.1371/journal.pcbi.1002992), 2013-03-21
Supplement: S5 (10.1371/journal.pcbi.1002992.s005) [file journal.pcbi.1002992.s005]

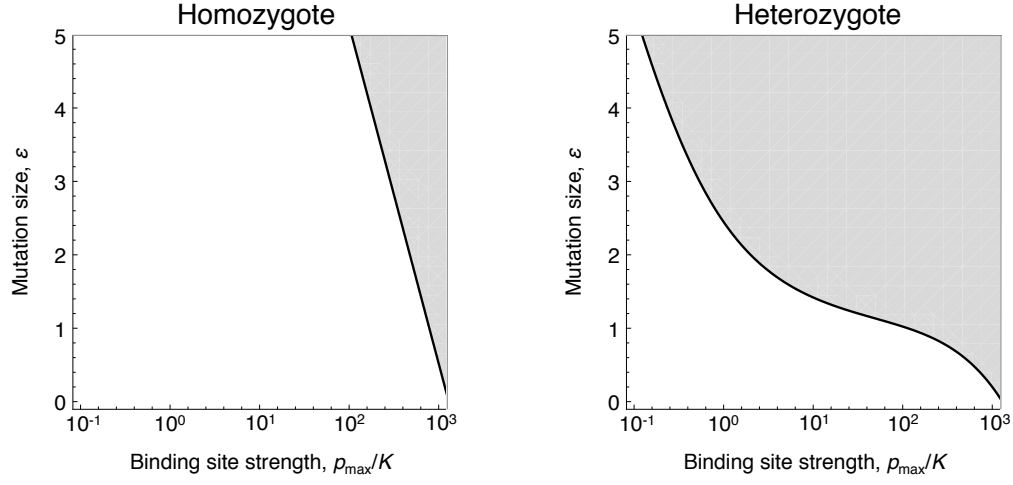

Figure S5: Invasibility of autoregulatory binding sites. The response time of mutant (left) homozygotes and (right) heterozygotes are shown. Different values of the binding strength of the resident allele, in units of  $p_{max}/K$  (x-axis), are plotted against mutations to binding site strength  $\epsilon$  of different size (y-axis). Thus the graphs compare a resident allele,  $K_1$  with a mutant allele,  $K_2 = K_1 \exp[-\epsilon]$ . Mutations falling into white region result in decreased response time in the carrier compared to resident genotype and are favoured by selection; mutations falling into the gray region result in increased response time and are not favoured by selection. Weak binding occurs when  $p_{max}/K \gtrsim 10^0$  [10, 11]. Response times were calculated by numerically integrating Eq. 1 from zero protein concentration to 99% of the equilibrium. The optimal binding strength in these graphs is  $p_{max}/K = 1250$ , corresponding to a background transcription rate  $k_l/\gamma_p = 10^{-3}$ .
