# Supplementary material for: Under-Dominance Constrains the Evolution of Negative Autoregulation in Diploids
Source: PLOS journal article supplement (doi:10.1371/journal.pcbi.1002992), 2013-03-21
Supplement: S7 (10.1371/journal.pcbi.1002992.s007) [file journal.pcbi.1002992.s007]

| <b>Gene</b>       | <b>Autoregulation</b> | <b>Evidence</b>  | <b>Function</b>                                                                             | <b>Chromosome</b> |
|-------------------|-----------------------|------------------|---------------------------------------------------------------------------------------------|-------------------|
| <i>AP-2alphaA</i> | Positive              | General function | Controls keratinocyte-specific gene expression                                              | -                 |
| <i>Fos</i>        | Negative              | Direct           | Activator or repressor as a heterodimer with <i>Jun</i>                                     | 14                |
| <i>Jun</i>        | Positive              | General function | Activator, in particular of genes required for DNA synthesis and cell proliferation         | 1                 |
| <i>Myc</i>        | Negative              | Direct           | Causes release of cytochrome C from mitochondria and subsequent Caspase-9 processing        | 8                 |
| <i>Elk1</i>       | Positive              | General function | Mediates insulin-increased transcription of the prolactin gene in pituitary cells           | X                 |
| <i>Gli1</i>       | Positive              | Direct           | Gli-1 intracellular localization regulated by nucleocytoplasmic shuttling by Su(fu) protein | 12                |
| <i>Nr3c1</i>      | Dual                  | General function | Activator or repressor in response to glucocorticoid hormones                               | 5                 |
| <i>Hnf4a</i>      | Positive              | General function | Not specified                                                                               | 20                |
| <i>Nfkb2</i>      | Positive              | General function | Activator when present as heterodimer with RelA                                             | 10                |
| <i>Irf1</i>       | Positive              | General function | Positive regulator of interferon-beta and IFN-induced genes                                 | 5                 |
| <i>Maz</i>        | Negative              | Direct           | Involved in transcriptional initiation and termination at the c-myc P2 promoter             | 16                |
| <i>Nfkb1</i>      | Positive              | General function | Key regulator of genes involved in responses to infection, inflammation, stress             | 4                 |
| <i>Tp53</i>       | Dual                  | Direct           | Tumor suppressor, required for cells to pass the G1-S checkpoint                            | 17                |
| <i>Sp1</i>        | Positive              | Direct           | Important regulator of keratinocyte-specific gene expression                                | 12                |

Table S2: Autoregulation in Humans [2, 6, 7, 8, 9] (continued below).

| <b>Gene</b>   | <b>Autoregulation</b> | <b>Evidence</b>  | <b>Function</b>                                                                                  | <b>Chromosome</b> |
|---------------|-----------------------|------------------|--------------------------------------------------------------------------------------------------|-------------------|
| <i>Srf</i>    | Dual                  | General function | Induces an optimal TFIID conformation for recruitment of the transcription preinitiation complex | 6                 |
| <i>Sry</i>    | Not specified         | -                | Sex-determining region Y gene product; testis-determining factor                                 | Y                 |
| <i>Runx1</i>  | Positive              | General function | Related to t(8,21) acute myeloid leukemia                                                        | 21                |
| <i>Atf3</i>   | Negative              | Direct           | Plays a critical role in accelerating caspase protease activation and apoptosis                  | 1                 |
| <i>Fosl1</i>  | Positive              | Direct           | Activator as a heterodimer with Jun factors                                                      | 11                |
| <i>Stat1</i>  | Positive              | General function | Acts synergistically with NF-kappaB for activation of inflammatory genes                         | 2                 |
| <i>E2f1</i>   | Positive              | Direct           | Regulates the expression of Apaf-1, the gene for apoptosis protease-activating factor 1          | -                 |
| <i>Spi1</i>   | Positive              | General function | Binding sites cooperate for activation of some myeloid-specific promoters                        | 11                |
| <i>Sp3</i>    | Negative              | General function | Expression of Sp1 and Sp3 was found co-regulated in fibrosarcoma cell lines                      | 2                 |
| <i>Phox2b</i> | Positive              | General function | Activates gene expression of DBH and c-Fos T00123 in response to both the PKA and PKC            | 4                 |
| <i>Irf7</i>   | Not specified         | -                | Not specified                                                                                    | 11                |
| <i>Irf4</i>   | Positive              | General function | essential for function of mature B- and T-lymphocytes                                            | -                 |
| <i>Tp73</i>   | Not specified         | -                | Not specified                                                                                    | 1                 |
| <i>Tp63</i>   | Not specified         | -                | Not specified                                                                                    | 3                 |

Table S2: Autoregulation in Humans continued [2, 6, 7, 8, 9].
