# Supplementary material for: Under-Dominance Constrains the Evolution of Negative Autoregulation in Diploids
Source: PLOS journal article supplement (doi:10.1371/journal.pcbi.1002992), 2013-03-21
Supplement: S8 (10.1371/journal.pcbi.1002992.s008) [file journal.pcbi.1002992.s008]

| <b>Gene</b>    | <b>Autoregulation</b> | <b>Evidence</b>  | <b>Function</b>                                                                                                                                  | <b>Chromosome</b> |
|----------------|-----------------------|------------------|--------------------------------------------------------------------------------------------------------------------------------------------------|-------------------|
| <i>Antp</i>    | Positive              | Direct           | Homeotic selector gene                                                                                                                           | 3R                |
| <i>Cf2-II</i>  | Positive              | General function | Late activator in follicle cells during chorion formation                                                                                        | -                 |
| <i>Dfd</i>     | Positive              | Direct           | Homeotic selector gene product                                                                                                                   | 3R                |
| <i>E(spl)</i>  | Negative              | General function | Involved in lateral inhibition of AS-C proteins within neural clusters and in singling out one mother sensory cell per cell cluster              | 3R                |
| <i>Eip74EF</i> | Positive              | General function | Not specified                                                                                                                                    | 3L                |
| <i>Trl</i>     | Positive              | General function | Disrupts nucleosomal structures leading to a rearrangement of nucleosomes through an energy-requiring process                                    | 3L                |
| <i>Ubx</i>     | Positive              | Direct           | Facilitates assembly of transcription initiation complex                                                                                         | 3R                |
| <i>bab1</i>    | Negative              | General function | Not specified                                                                                                                                    | 3L                |
| <i>ems</i>     | Positive              | General function | Functions as a gap gene product in the first phase of its expression when it is expressed in a single anterior band where the head is developing | 3R                |
| <i>en</i>      | Positive              | Direct           | Segment polarity gene                                                                                                                            | 2R                |
| <i>eve</i>     | Positive              | Direct           | Pair-rule gene product, generally acting as repressor                                                                                            | 2R                |
| <i>ftz</i>     | Positive              | Direct           | Pair-rule gene product, mutations of which may cause loss of half of larval segments                                                             | 3R                |
| <i>gl</i>      | Positive              | General function | Required for normal photoreceptor cell development                                                                                               | 3R                |
| <i>gsb</i>     | Positive              | General function | Segment polarity gene product specifying the identity of row 5 neuroblasts                                                                       | 2R                |

Table S3: Autoregulation in *Drosophila* [3, 6, 7, 8, 9] (continued below).

| <b>Gene</b> | <b>Autoregulation</b> | <b>Evidence</b>  | <b>Function</b>                                                                    | <b>Chromosome</b> |
|-------------|-----------------------|------------------|------------------------------------------------------------------------------------|-------------------|
| <i>hb</i>   | Positive              | General function | Gap gene                                                                           | 3R                |
| <i>ovo</i>  | Negative              | General function | Regulates female germ line development, maintenance and gametogenesis              | X                 |
| <i>slbo</i> | Positive              | General function | May be required for expression of gene products that mediate border cell migration | 2R                |
| <i>tin</i>  | Dual                  | General function | Required for the development of dorsal mesoderm, including heart                   | 3R                |
| <i>vvl</i>  | Positive              | General function | Not specified                                                                      | 3L                |

Table S3: Autoregulation in *Drosophila* continued [3, 6, 7, 8, 9].
